# Supplementary material
Source: MDPI journal article supplement (https://www.mdpi.com/2073-4441/9/2/78)
Supplement: s1 [file s1]

# Supplementary Materials: Spatial and Temporal Changes in Temperature, Precipitation, and Streamflow in the Miyun Reservoir Basin of China

Tiezhu Yan, Zhenyao Shen \* and Jianwen Bai

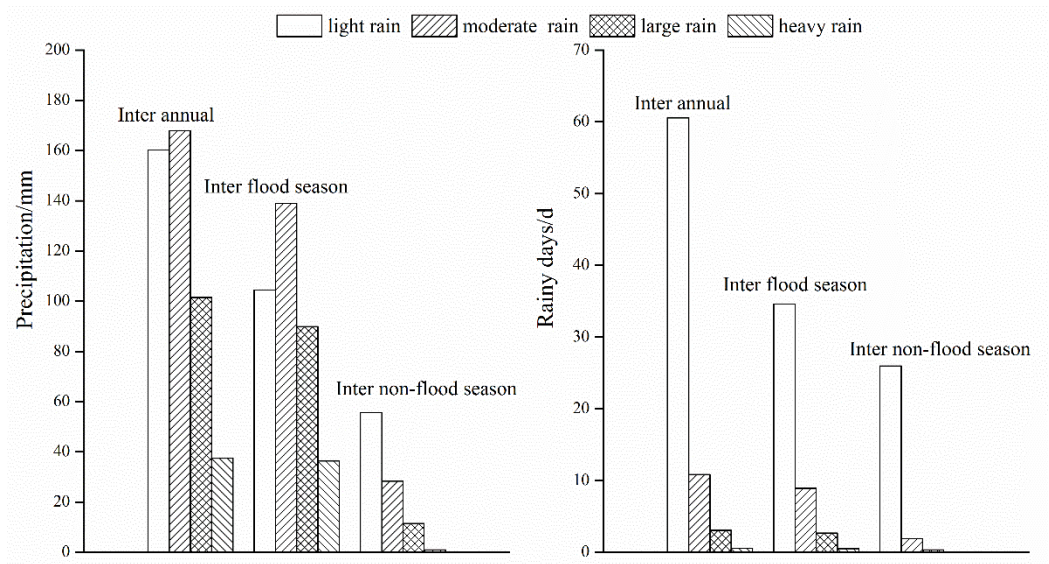

Figure S1. Distribution of precipitation (left) and rainy day (right) for different precipitation grades
